# Supplementary material for: Pyoverdine binding aptamers and label-free electrochemical detection of pseudomonads
Source: Frontiers journal article supplement (doi:10.3389/fchem.2024.1438710), 2024-08-01
Supplement: Data_Sheet_1.pdf [file Data_Sheet_1.pdf]

*Supplementary Material*

**Pyoverdine Binding Aptamers and Label-Free Electrochemical Detection of Pseudomonads**

**Sharif Anisuzzaman,<sup>1,2</sup> Nima Alimoradi,<sup>3</sup> Dilini Singappuli-Arachchige,<sup>1,4</sup> Soma Banerjee,<sup>4</sup> Gennady V. Pogorelko,<sup>1,4</sup> Yunus A. Kaiyum,<sup>5</sup> Philip E Johnson,<sup>5</sup> Pranav Shrotriya,<sup>1,3</sup> Marit Nilsen-Hamilton<sup>1,2</sup>**

<sup>1</sup>Ames Laboratory, U. S. Department of Energy, Ames, Iowa; <sup>2</sup>Roy J. Carver Department of

Biochemistry, Biophysics and Molecular Biology, Iowa State University, Ames, Iowa; Iowa;

<sup>3</sup>Department of Mechanical Engineering, Iowa State University, <sup>4</sup>Ames, Iowa; Aptalogic Inc., Ames,

IA; <sup>5</sup>Department of Chemistry, York University, Ontario, Canada

## TABLES

Table S1. Comparison of methods for detecting pyoverdine

| Method                         | Detection method                                                                                                                                   | sensitivity                                                                                                                            | detection limits                                          |
|--------------------------------|----------------------------------------------------------------------------------------------------------------------------------------------------|----------------------------------------------------------------------------------------------------------------------------------------|-----------------------------------------------------------|
| <b>Colorimetric</b>            | Binding of pyoverdine and other siderophores to iron results in a color change (Louden et al., 2011)                                               | Positive for all siderophores                                                                                                          | Visual indicator, and quantification could be challenging |
| <b>Fluorescence Assays</b>     | Intrinsic fluorescence of chromogenic metabolite (Cueva et al., 2020)                                                                              | Linearity range of 10-1000 ng/ml (7.3 nM – 732 nM)                                                                                     | LOD<br>0.9 ng/ml (0.6 nM)                                 |
| <b>Electrochemical Sensing</b> | PVD oxidation on carbon electrodes coated with electrochemically generated graphene functionalized with gold nanoparticles (Gandouzi et al., 2018) | A linear range of 1-100 $\mu$ M pyoverdine in PBS. Detected 25 $\mu$ M pyoverdine in serum, saliva and tap water matrices.             | LOD: 333.33 nM                                            |
|                                | Pyoverdine sensing with aptamers (this report)                                                                                                     | A dynamic range over three log units from 5 - 1000 nM. Specific for pyoverdine over other siderophores - enterobactin and pseudobactin | LOD: 1.3 nM                                               |

**Legend:** A summary is given of the current methods for detecting pyoverdine. Some (colorimetric, fluorescence) require first extracting the pyoverdine to separate it from many other compounds that contribute to background noise.

**Table S2. Sequences of aptamers**

|         |                                                              |
|---------|--------------------------------------------------------------|
| 15THR1A | GGTTGGTGTGGTTGG                                              |
| 21COD1A | TGGGTCGGGAGGGAATGCGGG                                        |
| 32THR4A | GGTAGGGCAGGTTGGGTGTTTTCACTTTTGGG                             |
| 55PYO2A | CTAGGAATCAGGAGCGAATGTTAGAGTATTTGGATAGTATGTTTATT<br>GTATCGGC  |
| 55PYO4A | GATCGGAATGGGAGCGA<br>ATGAG GAGGGAGCGCGGACATGGTGCAGCAGCCCGACG |
| BRC     | GAGACGGUCGGGUCCAGAUAUUCGUAUCUGUCGAGUAGAGUGUGGGC<br>UC        |

**Table S3. Sequences of other nucleic acids used in DNA SELEX**

|                                                        |                                                                                                              |
|--------------------------------------------------------|--------------------------------------------------------------------------------------------------------------|
| Oligo 5615<br>5' primer                                | GCCTGTTGTGAGCCTCCTGTCGAA                                                                                     |
| Oligo 5617<br>3' primer                                | GGGAGACAAGAATAAACGCTC                                                                                        |
| Oligo 5625<br>5' primer<br>complement                  | TTCGACAGGAGGCTCACAACAGGC                                                                                     |
| Oligo 5636<br>55PYO2A with<br>primer binding<br>region | GCCTGTTGTGAGCCTCCTGTCGAACTAGGAATCAGGAGC<br>GAATGTTAGAGTATTTGGATAGTATGTTTATTGTATCGGCG<br>AGCGTTTATTCTTGTCTCCC |
| Oligo 5637<br>Control<br>oligonucleotide               | GCCTGTTGTGAGCCTCCTGTCGAAGTATGCGATAGGAGC<br>GAATGATATATATCAAGTTACCACACGGATGTACTTGCTTG<br>AGCGTTTATTCTTGTCTCCC |
| Oligo 5685<br>55PYO4A with<br>primer binding<br>region | GCCTGTTGTGAGCCTCCTGTCGAAGATCGGAATGGGAGC<br>GAATGAGGAGGGAGCGCGGACATGGTGCAGCAGCCCGA<br>CGGAGCGTTTATT           |

**Table S4: Selection scheme for DNA aptamers that bind PVD-Pf5.**

| Round                | ssDNA:<br>PVD-Pf5 | Target                                       | Length of<br>capture oligo<br>(nt) | Incubation<br>temperature |
|----------------------|-------------------|----------------------------------------------|------------------------------------|---------------------------|
| 1                    | 1:1               | Ferric PVD-Pf5                               | 6                                  | 4                         |
| 2                    | 2:1               | Ferric PVD-Pf5                               | 6                                  | 4                         |
| 3                    | 3:1               | Ferric PVD-Pf5                               | 7                                  | 4                         |
| Counter<br>selection | 1:1               | Ferric enterobactin and<br>Ferric ornibactin | 7                                  | 4                         |
| 4                    | 5:1               | Ferric PVD-Pf5                               | 8                                  | 4                         |
| 5                    | 6:1               | Ferric PVD-Pf5                               | 8                                  | 23                        |
| 6                    | 7:1               | Ferric PVD-Pf5                               | 8                                  | 23                        |
| Counter<br>selection | 1:1               | Ferric enterobactin and<br>Ferric ornibactin | 8                                  | 23                        |
| 7                    | 8:1               | Ferric PVD-Pf5                               | 8                                  | 23                        |
| 8                    | 10:1              | Ferric PVD-Pf5                               | 9                                  | 23                        |
| 9                    | 10:1              | Ferric PVD-Pf5                               | 9                                  | 23                        |
| 10                   | 10:1              | Ferric PVD-Pf5                               | 9                                  | 23                        |

**Legend:** Ferric-enterobactin and ferric-ornibactin were used as counter selection targets. Selection was performed in SSMA2.

## FIGURES

**Figure S1.** NextGEN sequencing data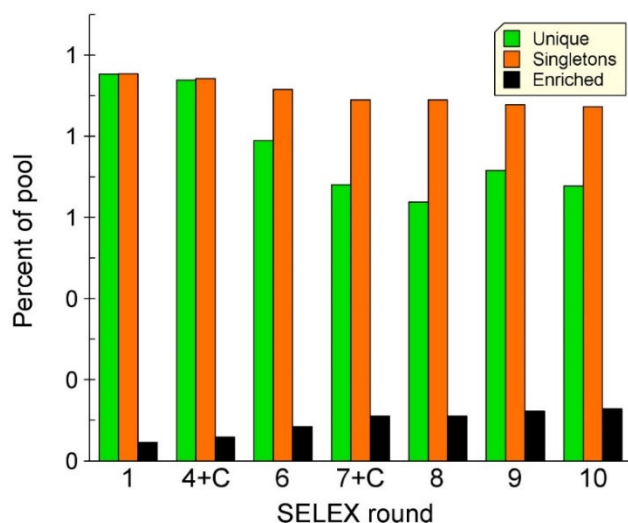

**Legend:** Next gen sequencing data from DNA SELEX showed downward trends of the unique fraction (number of species in pool divided by pool size) and singletons (species present only once in the database) and a rise in the enriched species (species present more than once in the database).

**Figure S2: Screening for aptamers**

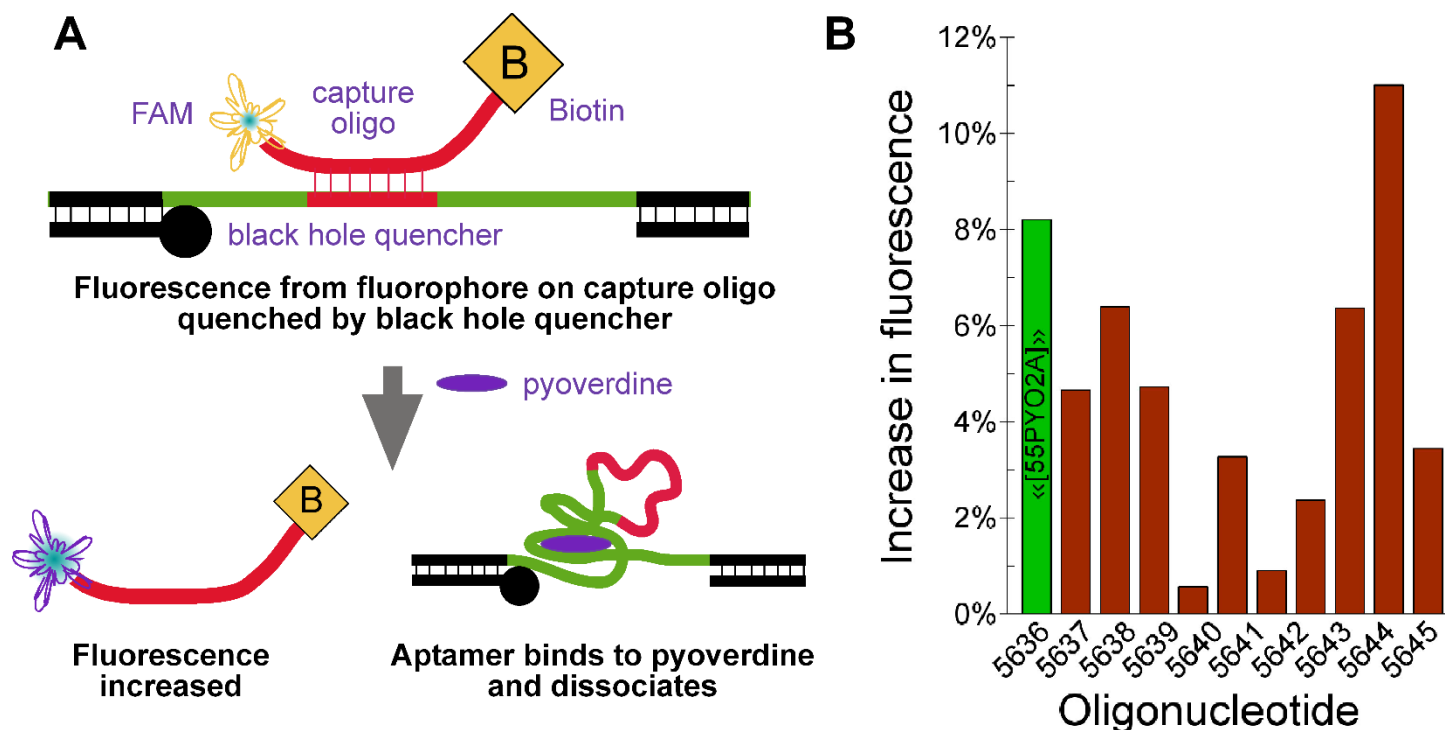

**LEGEND:** Aptamer screening by fluorescence quenching assay **A)** ssDNA aptamer candidates were hybridized with FAM (6-Carboxyfluorescein) and biotin-labeled capture oligo and black hole quencher labeled blocking oligo on 5' end and blocking oligo on 3' end. FAM fluorescence was quenched by the black hole quencher in the hybridized complex (capture oligo-aptamer-blocking oligos). After binding with pyoverdine the aptamer dissociates from complex and fluorescence increases from the fluorophore attached to the capture oligo. This assay was performed in streptavidin coated microwells by which the biotinylated capture oligo was held to the surface. The depiction in A is based on Fig. 1 for aptamer screening in (Zhao et al., 2019). **B)** Binding of 40nM candidate aptamers with 800nM pyoverdine. Candidate 5636 contains the sequence of 55PYO2A

**Figure S3:** The structure of PVD-Pf5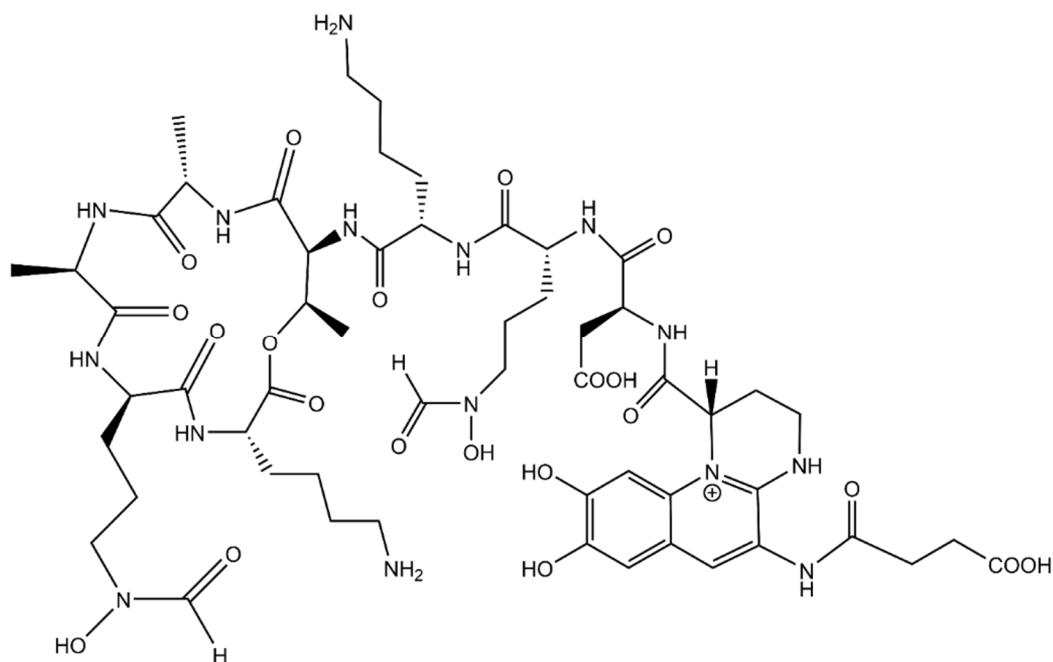

**Legend:** The structure of PVD-Pf5 is shown (Hartney et al., 2013)

## Citations

- Cueva, A. R., Pham, O., Diaby, A., Fleming, D., Rumbaugh, K. P. & Fernandes, G. E. 2020. Pyoverdine Assay for Rapid and Early Detection of *Pseudomonas aeruginosa* in Burn Wounds. *ACS Applied Bio Materials*, 3, 5350-5356.
- Gandouzi, I., Tertis, M., Cernat, A., Bakhrouf, A., Coros, M., Pruneanu, S. & Cristea, C. 2018. Sensitive detection of pyoverdine with an electrochemical sensor based on electrochemically generated graphene functionalized with gold nanoparticles. *Bioelectrochemistry*, 120, 94-103.
- Hartney, S. L., Mazurier, S., Girard, M. K., Mehnaz, S., Davis, E. W., 2nd, Gross, H., Lemanceau, P. & Loper, J. E. 2013. Ferric-pyoverdine recognition by Fpv outer membrane proteins of *Pseudomonas protegens* Pf-5. *Journal of bacteriology*, 195, 765-776.
- Louden, B. C., Haarmann, D. & Lynne, A. M. 2011. Use of Blue Agar CAS Assay for Siderophore Detection. *J Microbiol Biol Educ*, 12, 51-3.
- Zhao, M., Li, W., Liu, K., Li, H. & Lan, X. 2019. C4-HSL aptamers for blocking quorum sensing and inhibiting biofilm formation in *Pseudomonas aeruginosa* and its structure prediction and analysis. *PloS one*, 14, e0212041.
